# Supplementary material for: Fabrication of Bi2MoO6 Nanosheets/TiO2 Nanorod Arrays Heterostructures for Enhanced Photocatalytic Performance under Visible-Light Irradiation
Source: MDPI journal article supplement (doi:10.3390/nano12030574), 2022-02-08
Supplement: s1 [file s1]

# Fabrication of Bi<sub>2</sub>MoO<sub>6</sub> Nanosheets/TiO<sub>2</sub> Nanorod Arrays Heterostructures for Enhanced Photocatalytic Performance under Visible-Light Irradiation

Di Zhou <sup>1</sup>, Rui Du <sup>1</sup>, Zhenglong Hu <sup>2,\*</sup>, Shu Gao <sup>1</sup>, Yafang Tu <sup>1</sup>, Yunfei Fu <sup>1</sup>, Guang Zheng <sup>1,\*</sup> and Youhua Zhou <sup>1</sup>

<sup>1</sup> School of Optoelectronic Materials and Technologies, Jiangnan University, Wuhan 430056, China; dizhou@jhun.edu.cn (D.Z.); durui199602@163.com (R.D.); milton\_gao@jhun.edu.cn (S.G.); yafangtu@163.com (Y.T.); yffu89@jhun.edu.cn (Y.F.); xinge@whut.edu.cn (Y.Z.)

<sup>2</sup> Laboratory of Low-Dimension Functional Nanostructures and Devices, Hubei University of Science and Technology, Xianning 437100, China

\* Correspondence authors: huzhenglong@hbust.edu.cn (Z.H.); mzheng88@foxmail.com (G.Z.)

**Table S1.** Bi<sub>2</sub>MoO<sub>6</sub>-based photocatalysts and their photocatalytic performance.

| Materials                                                                                                   | Degradation rate (%)             | Time (min) | Rate constant $k$ (min <sup>-1</sup> ) | Pollutants         | Light sources | Ref. |
|-------------------------------------------------------------------------------------------------------------|----------------------------------|------------|----------------------------------------|--------------------|---------------|------|
| Bi <sub>2</sub> MoO <sub>6</sub> nanosheets                                                                 | 81                               | 150        |                                        | MB                 | UV light      | [1]  |
| Bi <sub>2</sub> MoO <sub>6</sub> @TiO <sub>2</sub> nano-tubes                                               | 21                               | 120        |                                        | MB                 | visible light | [1]  |
| Au/Bi <sub>2</sub> MoO <sub>6</sub> @TiO <sub>2</sub> nano-tubes                                            | 82                               | 120        | 0.0203                                 | MB                 | UV light      | [1]  |
|                                                                                                             | 68                               | 120        | 0.0081                                 | MB                 | visible light | [1]  |
|                                                                                                             | 95                               | 90         |                                        | BPA                | visible light | [1]  |
| Bi <sub>2</sub> MoO <sub>6</sub> nanosheets                                                                 | 68.1                             | 80         |                                        | MO                 | visible light | [2]  |
| Bi <sub>2</sub> MoO <sub>6</sub> /TiO <sub>2</sub> nanobelts                                                | 90.4                             | 80         |                                        | MO                 | visible light | [2]  |
| Bi <sub>2</sub> MoO <sub>6</sub> /TiO <sub>2</sub> nanobelts                                                | 100                              | 40         |                                        | MO                 | UV light      | [2]  |
| Bi <sub>2</sub> MoO <sub>6</sub> nanosheets                                                                 | 29.6                             | 40         |                                        | MO                 | UV light      | [2]  |
| Bi <sub>2</sub> MoO <sub>6</sub> /TiO <sub>2</sub> nanobelts                                                | 74                               | 60         | 0.016                                  | X-3B               | visible light | [3]  |
| Bi <sub>2</sub> MoO <sub>6</sub> microspheres                                                               | 20                               | 360        |                                        | MB                 | visible light | [4]  |
| TiO <sub>2</sub> /Bi <sub>2</sub> MoO <sub>6</sub>                                                          | 83~95                            | 360        |                                        | MB                 | visible light | [4]  |
| Bi <sub>2</sub> MoO <sub>6</sub> film                                                                       | 55                               | 240        | 0.0029                                 | ARS                | visible light | [5]  |
| Bi <sub>2</sub> MoO <sub>6</sub> /TiO <sub>2</sub> bilayer films                                            | 85                               | 240        | 0.0081                                 | ARS                | visible light | [5]  |
| TiO <sub>2</sub> -Bi <sub>2</sub> MoO <sub>6</sub> /Bi <sub>3.64</sub> Mo <sub>0.36</sub> O <sub>6.55</sub> | 93 for RhB, 83 for o-nitrophenol | 120        |                                        | RhB, o-nitrophenol | visible light | [6]  |
| Bi <sub>2</sub> MoO <sub>6</sub> /TiO <sub>2</sub> micro-spheres                                            | 78~96                            | 300        | 0.00459~0.00895                        | phenol             | visible light | [7]  |
|                                                                                                             | 76~94                            | 300        | 0.00456~0.00812                        | nitrobenzene       | visible light | [7]  |
| Bi <sub>2</sub> MoO <sub>6</sub> /TiO <sub>2</sub> nanofibers                                               | 92                               | 300        |                                        | RhB                | visible light | [8]  |

|                                                                                     |                             |     |                                 |         |                   |           |
|-------------------------------------------------------------------------------------|-----------------------------|-----|---------------------------------|---------|-------------------|-----------|
| Bi/Bi <sub>2</sub> MoO <sub>6</sub> /TiO <sub>2</sub> nano-tubes                    | 97.3                        | 100 | 0.03505                         | MB      | visible light     | [9]       |
|                                                                                     | 73.21 for MB, 92.98 for RhB | 120 | 0.00739 for MB, 0.02253 for RhB | MB, RhB | solar irradiation | [10]      |
| Bi <sub>2</sub> MoO <sub>6</sub> /ZIF-8<br>S-doped Bi <sub>2</sub> MoO <sub>6</sub> | 66.88                       | 100 |                                 | MB      | visible light     | [11]      |
|                                                                                     | 97                          | 60  |                                 | RhB     | visible light     | [12]      |
| Bi <sub>2</sub> MoO <sub>6</sub> /TiO <sub>2</sub> nanorods                         | 95                          | 180 | 0.015                           | MB      | visible light     | This work |

**Table S2.** The abbreviations of products with different amounts of Bi<sub>2</sub>MoO<sub>6</sub> by varying the mass of raw materials in precursor solution.

|       | Bi(NO <sub>3</sub> ) <sub>3</sub> ·5H <sub>2</sub> O (mg) | Na <sub>2</sub> MoO <sub>4</sub> ·2H <sub>2</sub> O (mg) |
|-------|-----------------------------------------------------------|----------------------------------------------------------|
| BMT-1 | 20                                                        | 5                                                        |
| BMT-2 | 48                                                        | 12                                                       |
| BMT-3 | 96                                                        | 24                                                       |
| BMT-4 | 144                                                       | 36                                                       |

**Table S3.** *S*<sub>BET</sub>, Pore Volume and Mean Pore Diameter of TiO<sub>2</sub>, Bi<sub>2</sub>MoO<sub>6</sub>, BMT-3 and BMT-4 samples.

| Samples                          | <i>S</i> <sub>BET</sub> (m <sup>2</sup> /g) | Pore Volume (cm <sup>3</sup> /g) | Mean Pore Diameter (nm) |
|----------------------------------|---------------------------------------------|----------------------------------|-------------------------|
| TiO <sub>2</sub>                 | 64.0                                        | 0.17                             | 9.7                     |
| Bi <sub>2</sub> MoO <sub>6</sub> | 26.0                                        | 0.05                             | 3.8                     |
| BMT-3                            | 88.2                                        | 0.18                             | 4.9                     |
| BMT-4                            | 60.7                                        | 0.10                             | 3.7                     |

**Table S4.** Pseudo-first-order rate constants and corresponding R-Square values of different samples.

| Samples                   | Reaction rate constant ( <i>k</i> ) (min <sup>-1</sup> ) | R-Square |
|---------------------------|----------------------------------------------------------|----------|
| Blank                     | 0.000538                                                 | 0.94606  |
| TiO <sub>2</sub> nanorods | 0.00113                                                  | 0.94418  |
| BMT-1                     | 0.00203                                                  | 0.96246  |
| BMT-2                     | 0.00662                                                  | 0.96883  |
| BMT-3                     | 0.015                                                    | 0.95206  |
| BMT-4                     | 0.0126                                                   | 0.96452  |

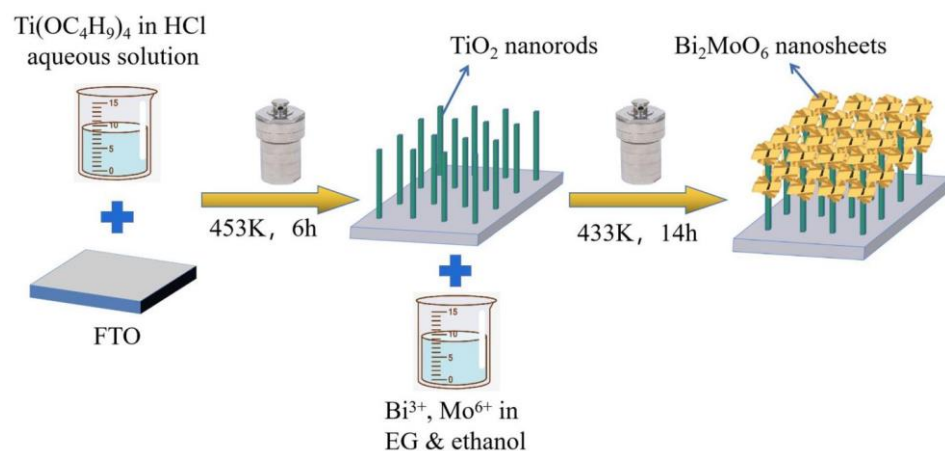

**Figure S1.** Stepwise synthesis protocol of TiO<sub>2</sub> nanorod arrays and Bi<sub>2</sub>MoO<sub>6</sub>/TiO<sub>2</sub> HSs.

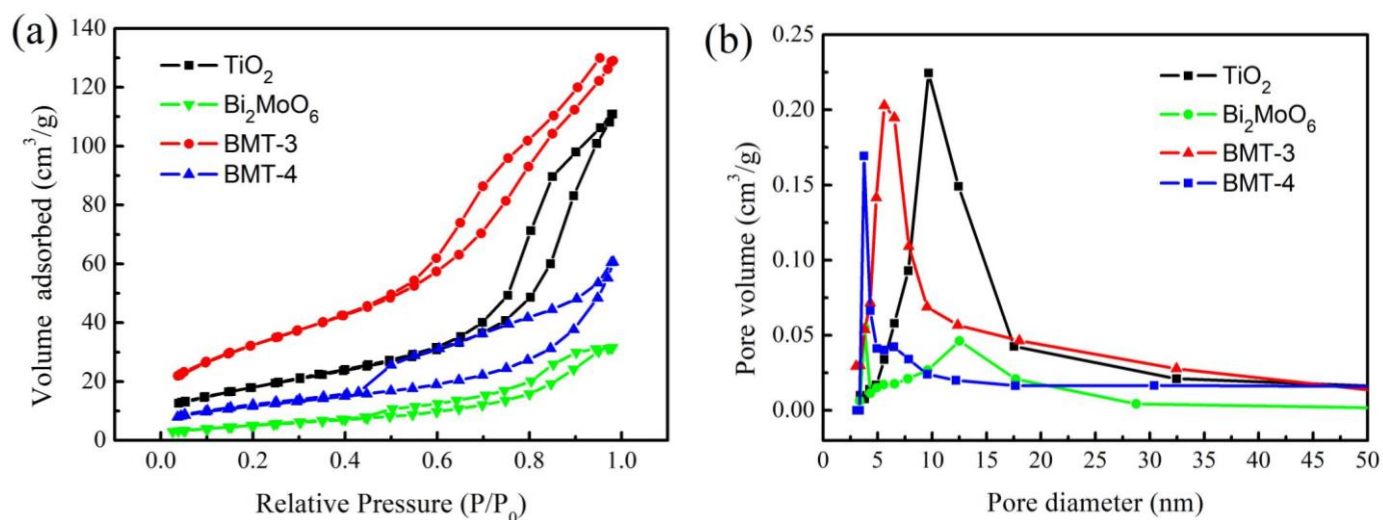

**Figure S2.** N<sub>2</sub> adsorption-desorption isotherms (a) and the corresponding pore-size distribution curves (b) of TiO<sub>2</sub>, Bi<sub>2</sub>MoO<sub>6</sub>, BMT-3 and BMT-4 samples.

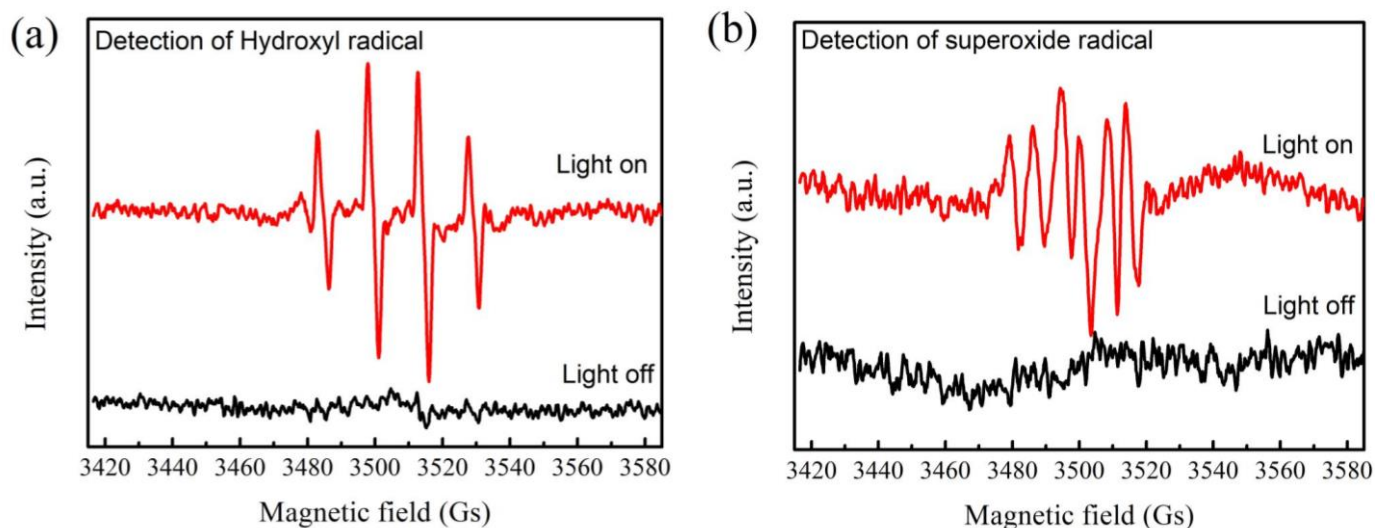

**Figure S3.** The ESR signals of •OH (a) and •O<sub>2</sub><sup>•-</sup> radicals (b) of BMT-3 photocatalysts.

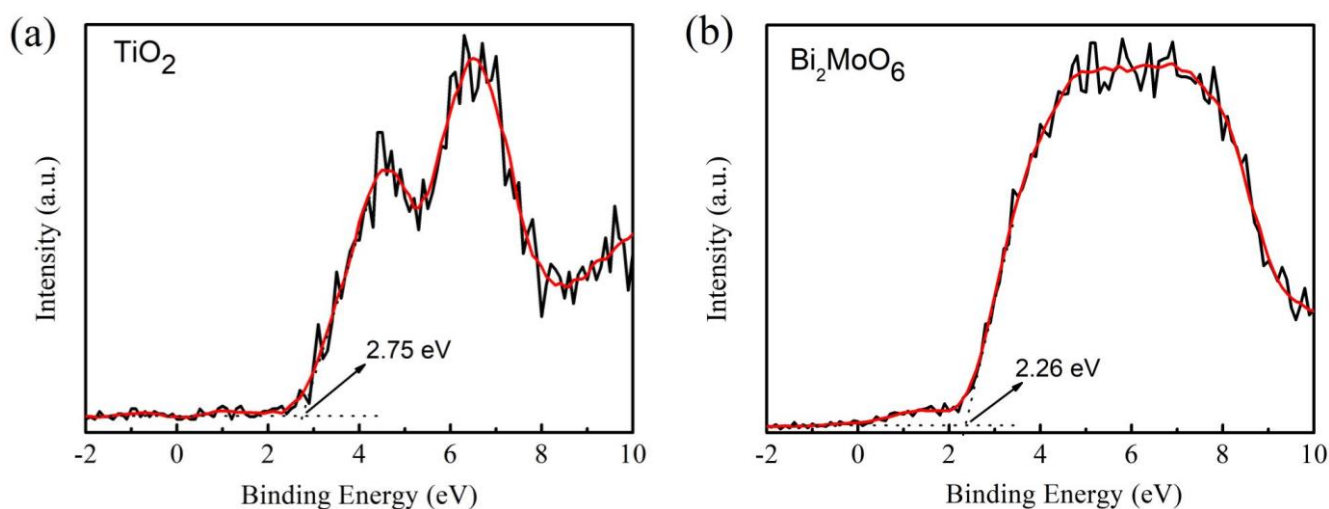

**Figure S4.** XPS valence band spectra of TiO<sub>2</sub> and Bi<sub>2</sub>MoO<sub>6</sub>.
